# Supplementary material for: Non-carbonic buffer power of whole blood is increased in experimental metabolic acidosis: An in-vitro study
Source: PubMed Central journal article supplement (PMC9634561; doi:10.3389/fphys.2022.1009378), 2022-10-21
Supplement: Table1.pdf [file Table1.pdf]

**Table S1.** The concentration of electrolytes in the stock solutions and their strong ion difference (SID).

|                     |        | Cl 15 | Cl 7.5 | Ctr | Lac 7.5 | Lac 15 |
|---------------------|--------|-------|--------|-----|---------|--------|
| [Na <sup>+</sup> ]  | mmol/l | 141   | 141    | 141 | 141     | 141    |
| [Cl <sup>-</sup> ]  | mmol/l | 382   | 244    | 106 | 106     | 106    |
| [Lac <sup>-</sup> ] | mmol/l | 0     | 0      | 0   | 138     | 276    |
| SID                 | mEq/l  | -241  | -103   | 35  | -103    | -241   |
